# Supplementary material
Source: publisher site journal article supplement (https://www.dovepress.com/article/562892)
Supplement: Supplementary file 1 [file 562892%20Supplementary%20Material.docx]

**Supplementary Box 1. Details of exercise protocols**

| **A. Warming up –full body stretching (5 minutes)** |
| --- |
| **B. Aerobic exercise using a cycle ergometer – Part A (20–30 minutes)** |
| 1 to 8 weeks   - HIIT: aerobic exercise at 60% of maximum aerobic power for 30 seconds with 1 minute rest intervals during 20 minutes - MICT: aerobic exercise at 50% of peak oxygen consumption during 20 minutes |
| 9 to 16 weeks   - HIIT: aerobic exercise at 60% of maximum aerobic power for 40 seconds with 1 minute rest intervals during 25 minutes - MICT: aerobic exercise at 50% of peak oxygen consumption during 25 minutes |
| 17 to 24 weeks   - HIIT: aerobic exercise at 60% of maximum aerobic power for 50 seconds with 1 minute rest intervals during 30 minutes - MICT: aerobic exercise at 50% of peak oxygen consumption during 30 minutes |
| **C. Calisthenics – chair squat, chair split squat, seated dorsi flexion, and standing calf raise (5 minutes)** |
| **D. Rest (5 minutes)** |
| **E. Aerobic exercise using a cycle ergometer – Part B (20–30 minutes)** |
| 1 to 8 weeks   - HIIT: aerobic exercise at 60% of maximum aerobic power for 30 seconds with 1 minute rest intervals during 20 minutes - MICT: aerobic exercise at 50% of peak oxygen consumption during 20 minutes |
| 9 to 16 weeks   - HIIT: aerobic exercise at 60% of maximum aerobic power for 40 seconds with 1 minute rest intervals during 25 minutes - MICT: aerobic exercise at 50% of peak oxygen consumption during 25 minutes |
| 17 to 24 weeks   - HIIT: aerobic exercise at 60% of maximum aerobic power for 50 seconds with 1 minute rest intervals during 30 minutes - MICT: aerobic exercise at 50% of peak oxygen consumption during 30 minutes |
| **F. Cooling down –full body stretching (5 minutes)** |

Abbreviation: HIIT=high-intensity interval training; MICT=moderate-intensity continuous training.

**Supplementary Figure 1. Baseline comparisons of KPPS total scores and subscores between intervention and control groups**


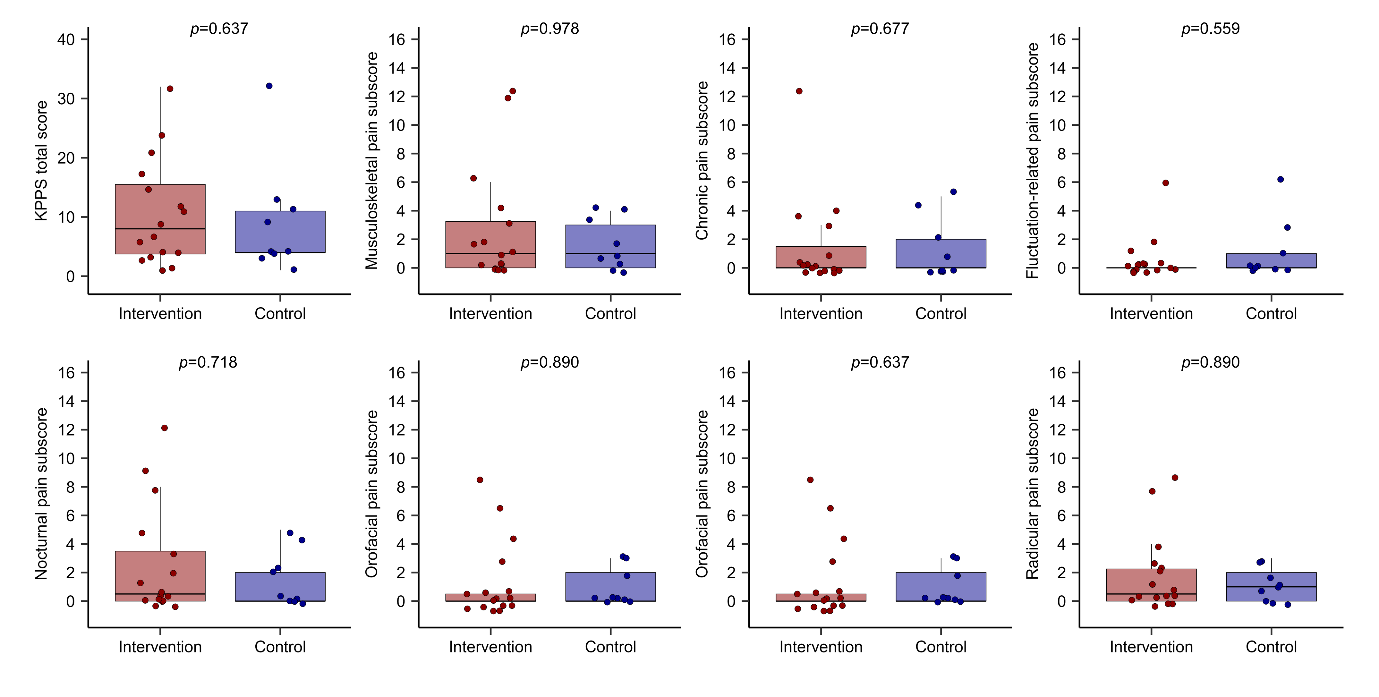


The boxes represent the interquartile ranges of each score, with the horizontal line in each box representing the median and whiskers showing the minimum and maximum values (excluding outliers that were more than 1.5 times the values represented at each end of the box).

Abbreviations: KPPS=King’s Parkinson's Disease Pain Scale
